# Supplementary material for: Temperature-dependent Raman spectroscopy and sensor applications of PtSe2 nanosheets synthesized by wet chemistry
Source: publisher site journal article supplement (doi:10.3762/bjnano.10.46), 2019-02-13
Supplement: Additional file 1 [file 2190-4286-10-46-S1.pdf]

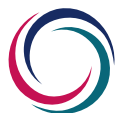

## Supporting Information

for

### **Temperature-dependent Raman spectroscopy and sensor applications of PtSe<sub>2</sub> nanosheets synthesized by wet chemistry**

Mahendra S. Pawar and Dattatray J. Late

*Beilstein J. Nanotechnol.* **2019**, *10*, 467–474. [doi:10.3762/bjnano.10.46](https://doi.org/10.3762/bjnano.10.46)

## Additional figures

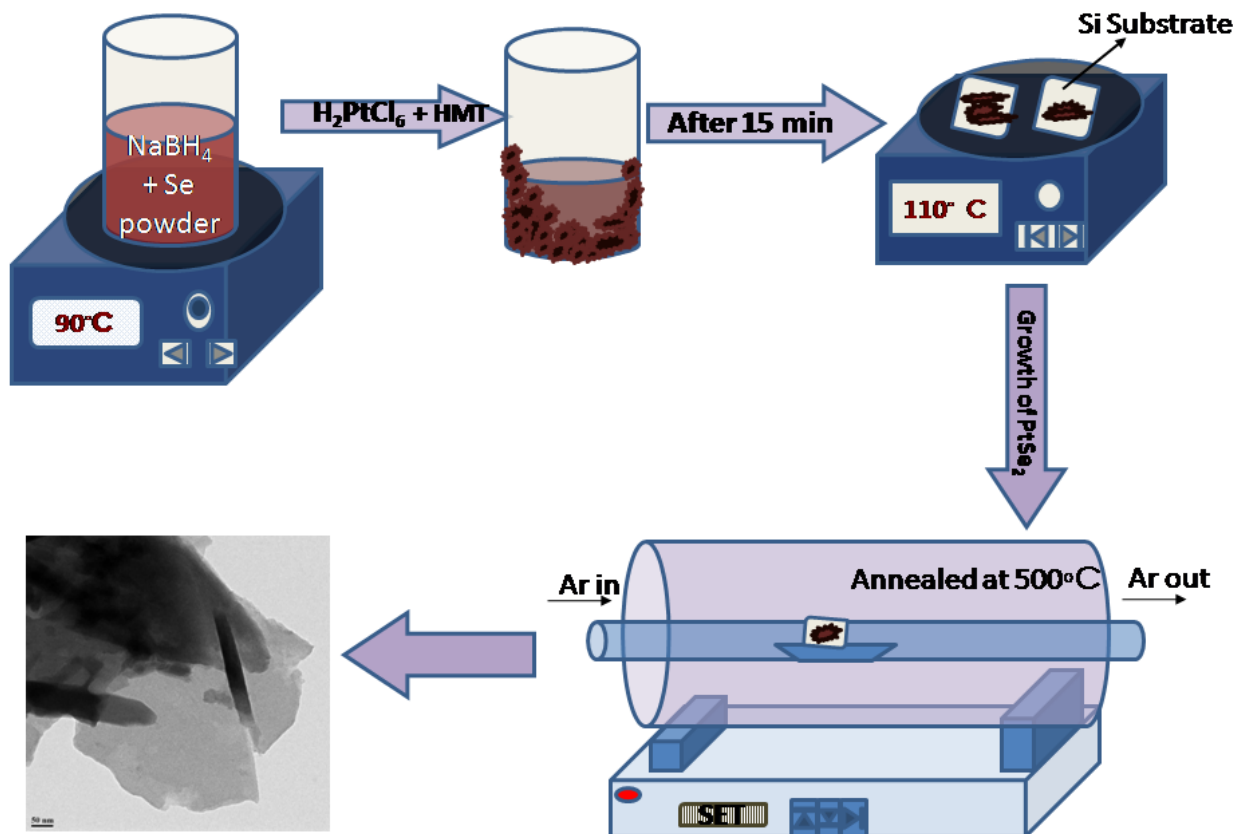

**Figure S1:** The schematic of PtSe<sub>2</sub> nanosheet synthesis steps.

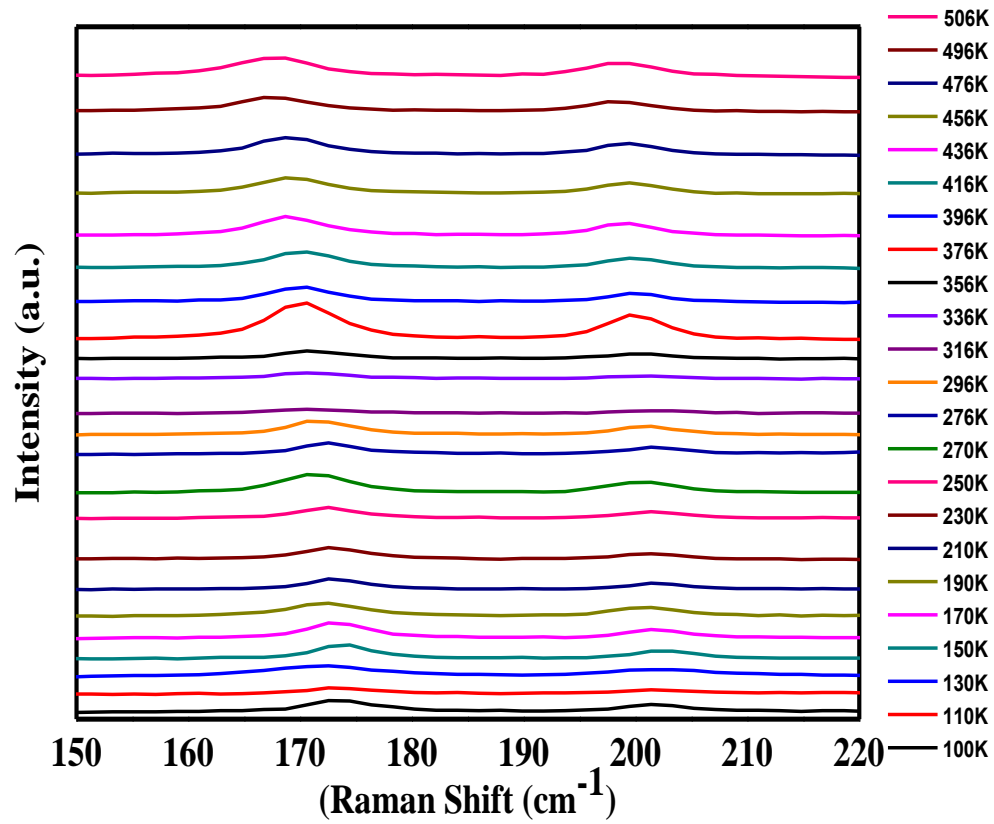

**Figure S2:** The Raman spectra of PtSe<sub>2</sub> nanosheets at different temperatures.

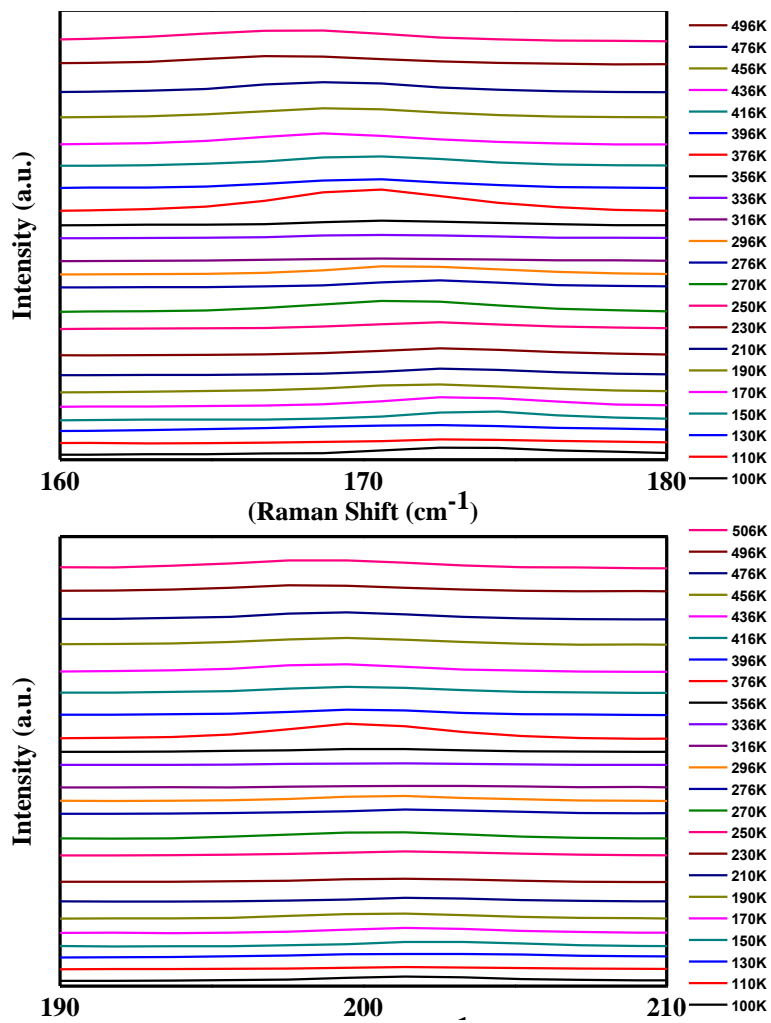

**Figure S3:** The normalized Raman spectra of PtSe<sub>2</sub> nanosheets at different temperatures for two modes.
